# Supplementary material for: Variation in Metal–Support Interaction with TiO2 Loading and Synthesis Conditions for Pt-Ti/SBA-15 Active Catalysts in Methane Combustion
Source: MDPI journal article supplement (doi:10.3390/nano13101647), 2023-05-15
Supplement: s1 [file s1]

# Variation of Metal-Support Interaction with $\text{TiO}_2$ loading and synthesis conditions for Pt-Ti/SBA-15 active catalysts in methane combustion

Mihaela Filip<sup>1</sup>, Elena Maria Anghel<sup>1,\*</sup>, Vasile Rednic<sup>2</sup>, Florica Papa<sup>1</sup>, Simona Somacescu<sup>1</sup>,  
Cornel Munteanu<sup>1</sup>, Nicolae Aldea<sup>2</sup>, J. Zhang<sup>3</sup>, and Viorica Parvulescu<sup>1,\*</sup>

<sup>1</sup> Ilie Murgulescu Institute of Physical Chemistry, Romanian Academy, Spl. Independentei 202, 060021 Bucharest, Romania

<sup>2</sup> National Institute for R&D of Isotopic and Molecular Technologies, Donat St. 67-103, 400293, Cluj-Napoca, Romania

<sup>3</sup> Beijing Synchrotron Radiation Facilities of Beijing Electron Positron Collider National Laboratory, 19B Yuquan Road, 100049, Beijing, China

\* Correspondence: vpirvulescu@icf.ro, manghel@icf.ro

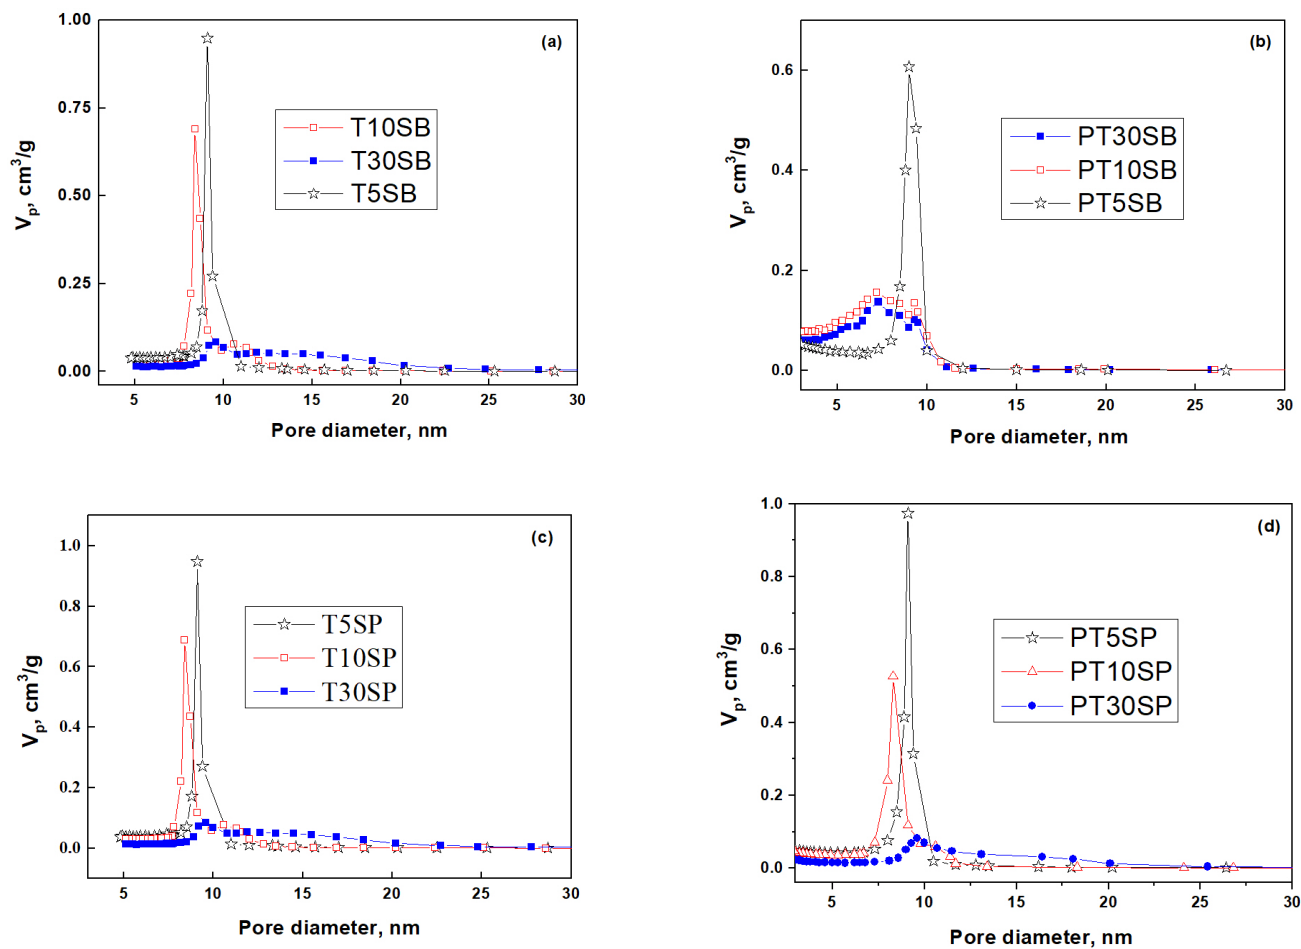

**Figure S1.** Pore size distribution of the (-/Pt)Ti(5/10/30)SB samples, before (a) and after Pt (b) immobilization on samples obtained with tetrabutylorthotitanate, and the (-/Pt)Ti(5/10/30)SP samples, before (c) and after Pt (d) immobilization on samples obtained with peroxotitanate.

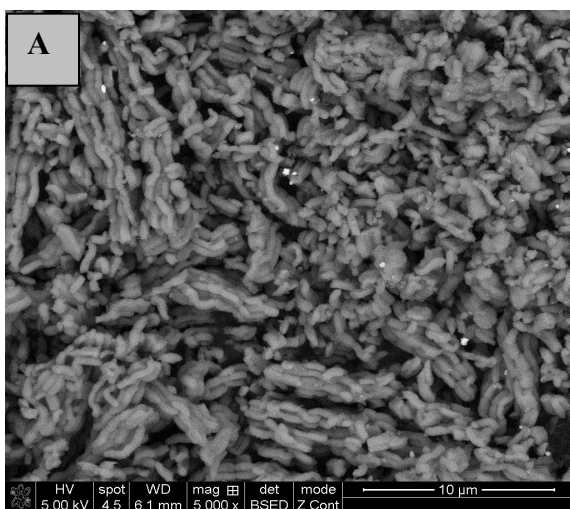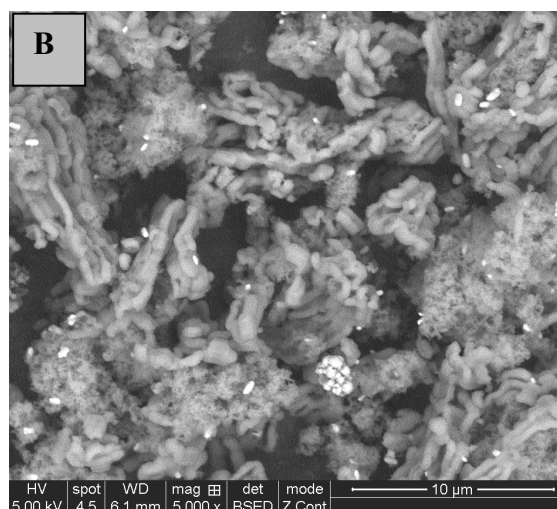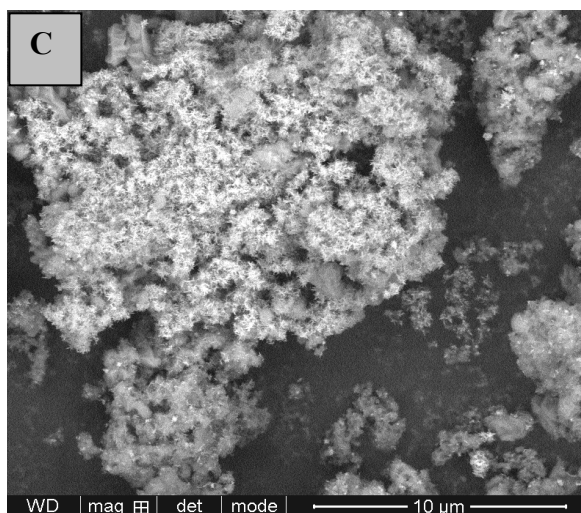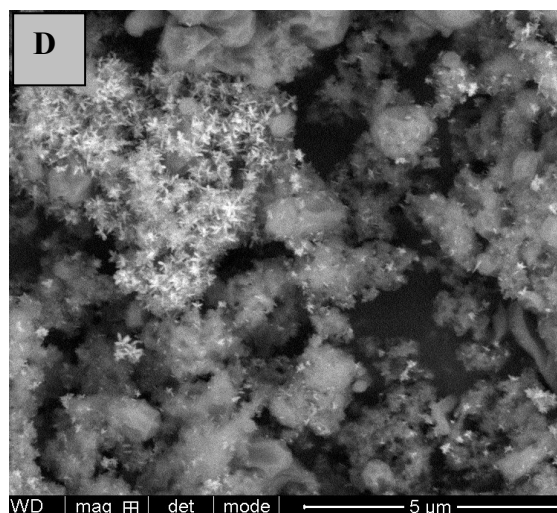

**Figure S2.** SEM images, recorded using back-scattered electrons (BSE), of PT5SP (A), PT10SP (B) and P30SP (C, D) samples.

## PT1SP

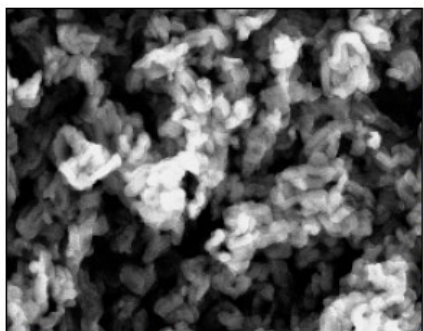

SE1  
20000x 1 μm  
kV:20.0 Tilt:0

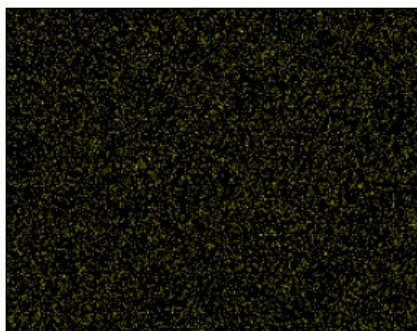

PtM  
20000x 1 μm  
kV:20.0 Tilt:0

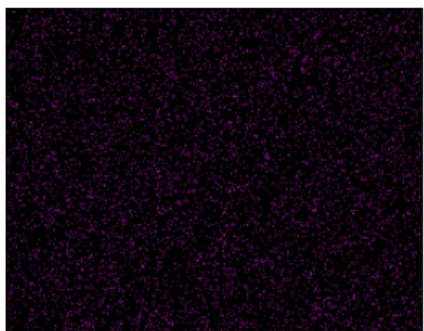

TiK  
20000x 1 μm  
kV:20.0 Tilt:0

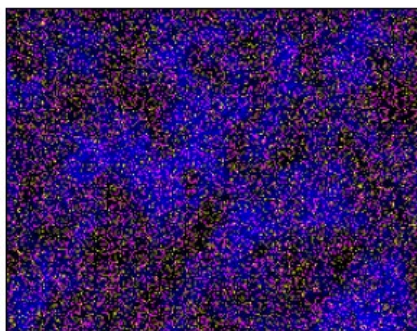

Si Pt Ti  
20000x 1 μm

## PT5SP

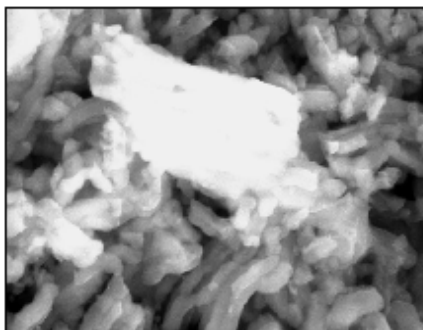

SE1  
20000x 1 μm  
kV:20.0 Tilt:0

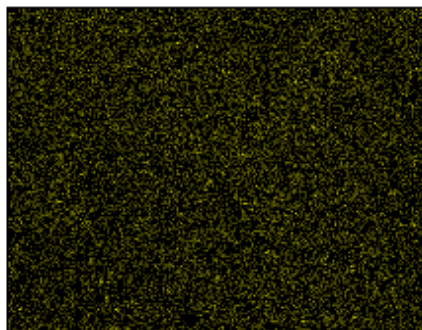

PtM  
20000x 1 μm  
kV:20.0 Tilt:0

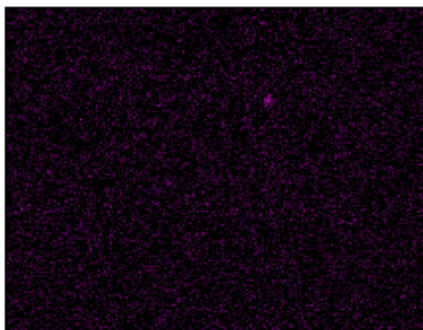

TiK  
20000x 1 μm  
kV:20.0 Tilt:0

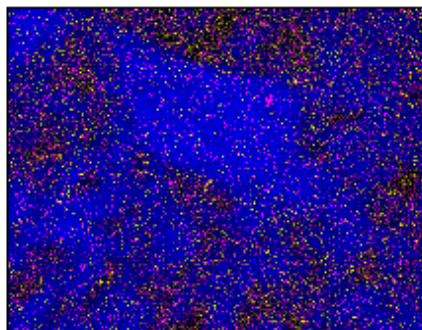

Si Pt Ti  
20000x 1 μm



## PT10SB

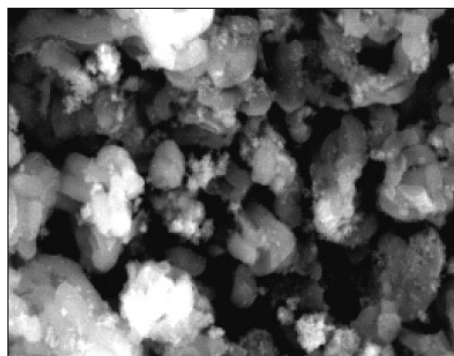

SE1  
20000x 1 μm  
kV:20.0 Tilt:0

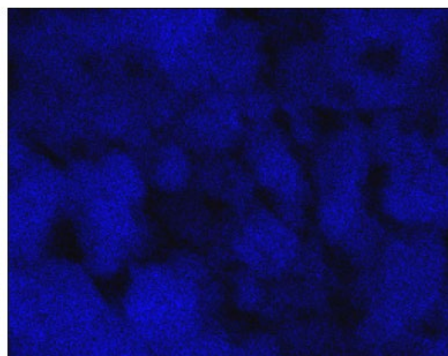

SiK  
20000x 1 μm  
kV:20.0 Tilt:0

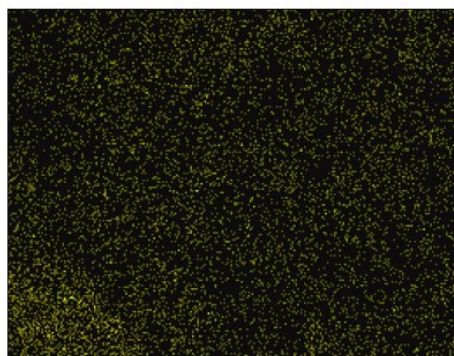

PtM  
20000x 1 μm  
kV:20.0 Tilt:0

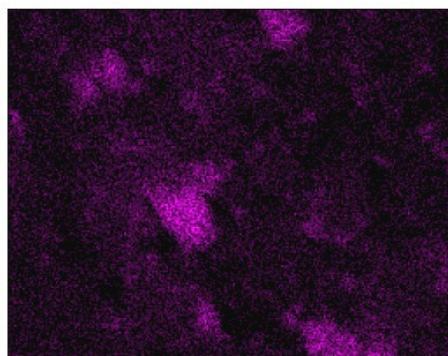

TiK  
20000x 1 μm  
kV:20.0 Tilt:0

## PT10SP

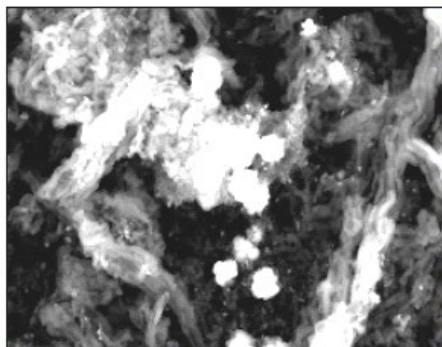

SE1  
8000x 5 μm  
kV:20.0 Tilt:0

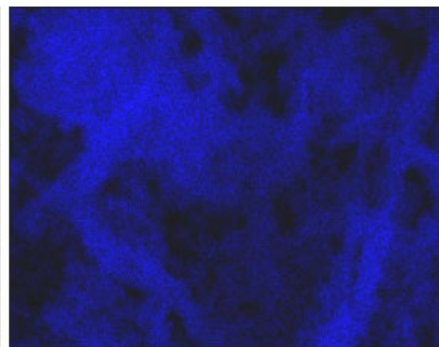

SiK  
8000x 5 μm  
kV:20.0 Tilt:0

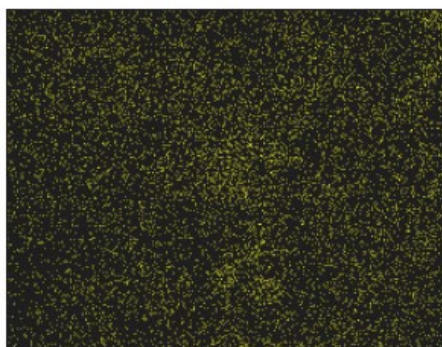

PtM  
8000x 5 μm  
kV:20.0 Tilt:0

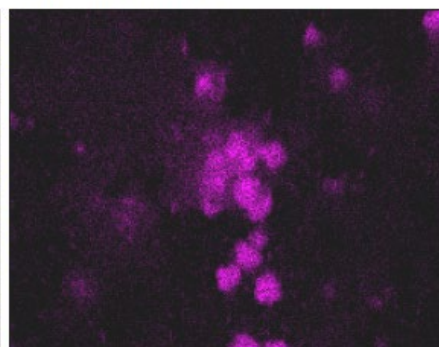

TiK  
8000x 5 μm  
kV:20.0 Tilt:0

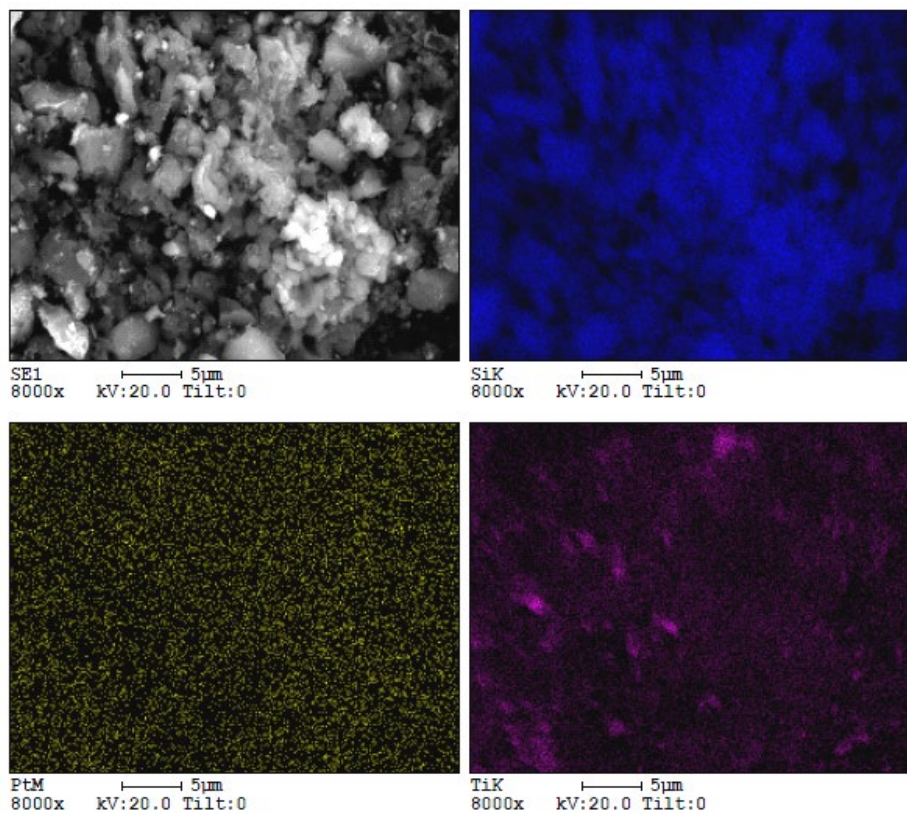

### PT30SB

**Figure S3.** Elemental mapping images obtained by SEM.

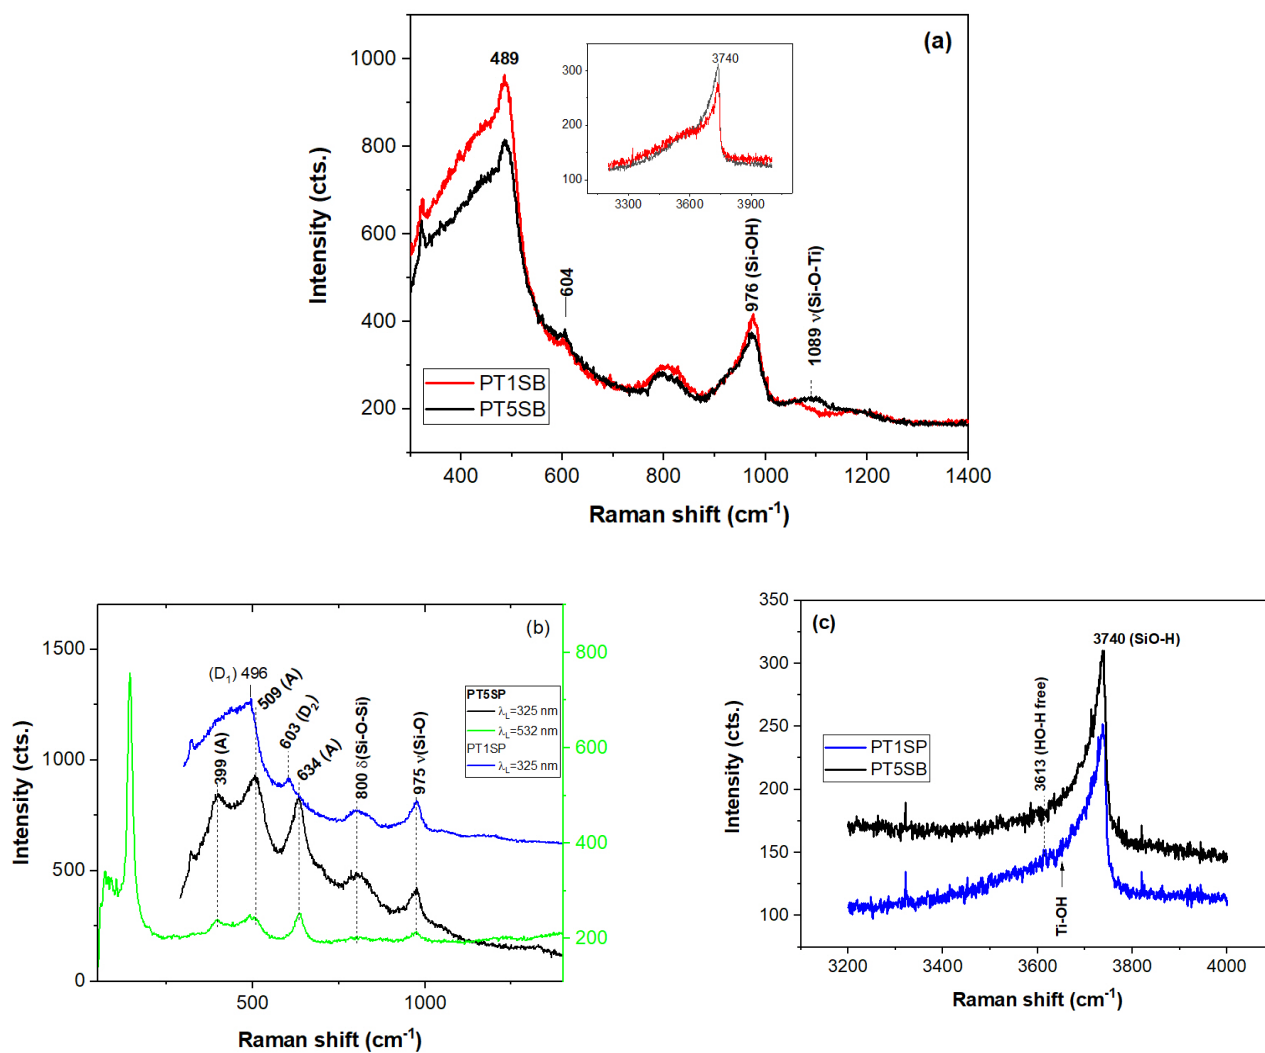

**Figure S4.** UV-Raman spectra of the PT(1/5)SB (a) and PT(1/5)SP (b,c) (A and R stand for anatase and Rutile). The Vis-Raman spectrum of the PT5SP was used for comparison.

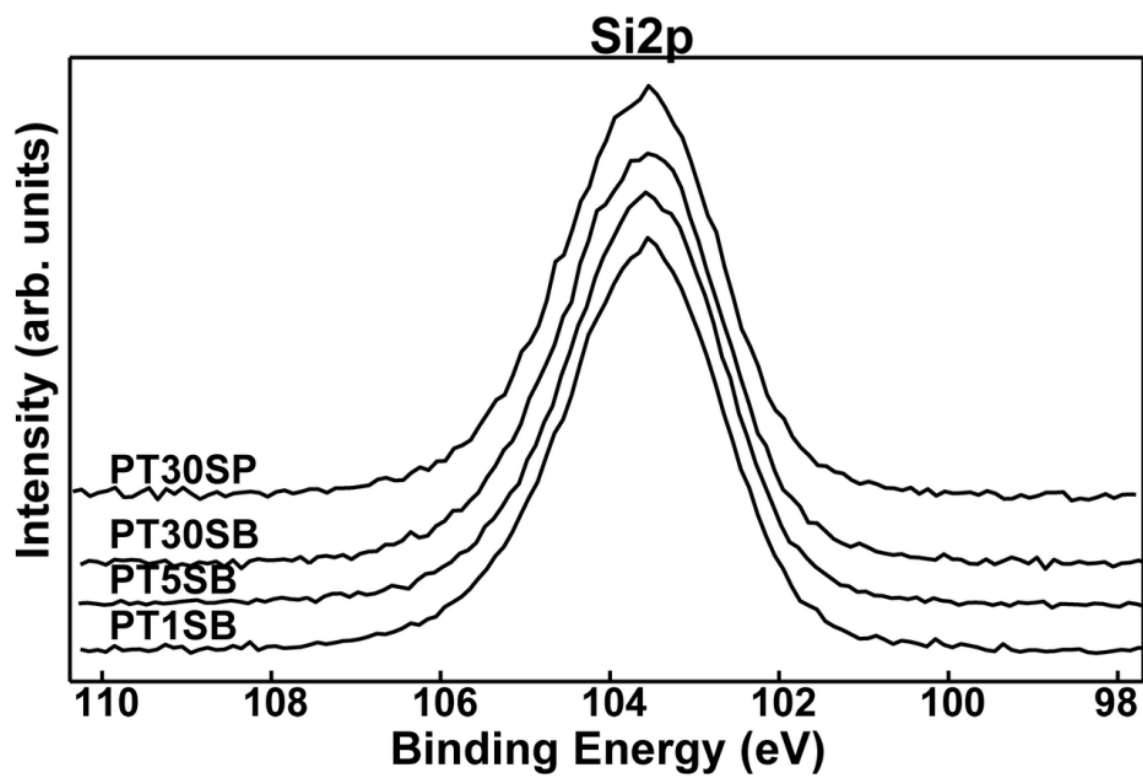

**Figure S5.** The XPS photoelectron spectra of the Si2p, superimposed spectra for PT1SB, PT5SB, PT30SB and PT30SP.
